# Supplementary material for: Clusterization in acute myeloid leukemia based on prognostic alternative splicing signature to reveal the clinical characteristics in the bone marrow microenvironment
Source: PubMed Central journal article supplement (PMC7552347; doi:10.1186/s13578-020-00481-5), 2020-10-12

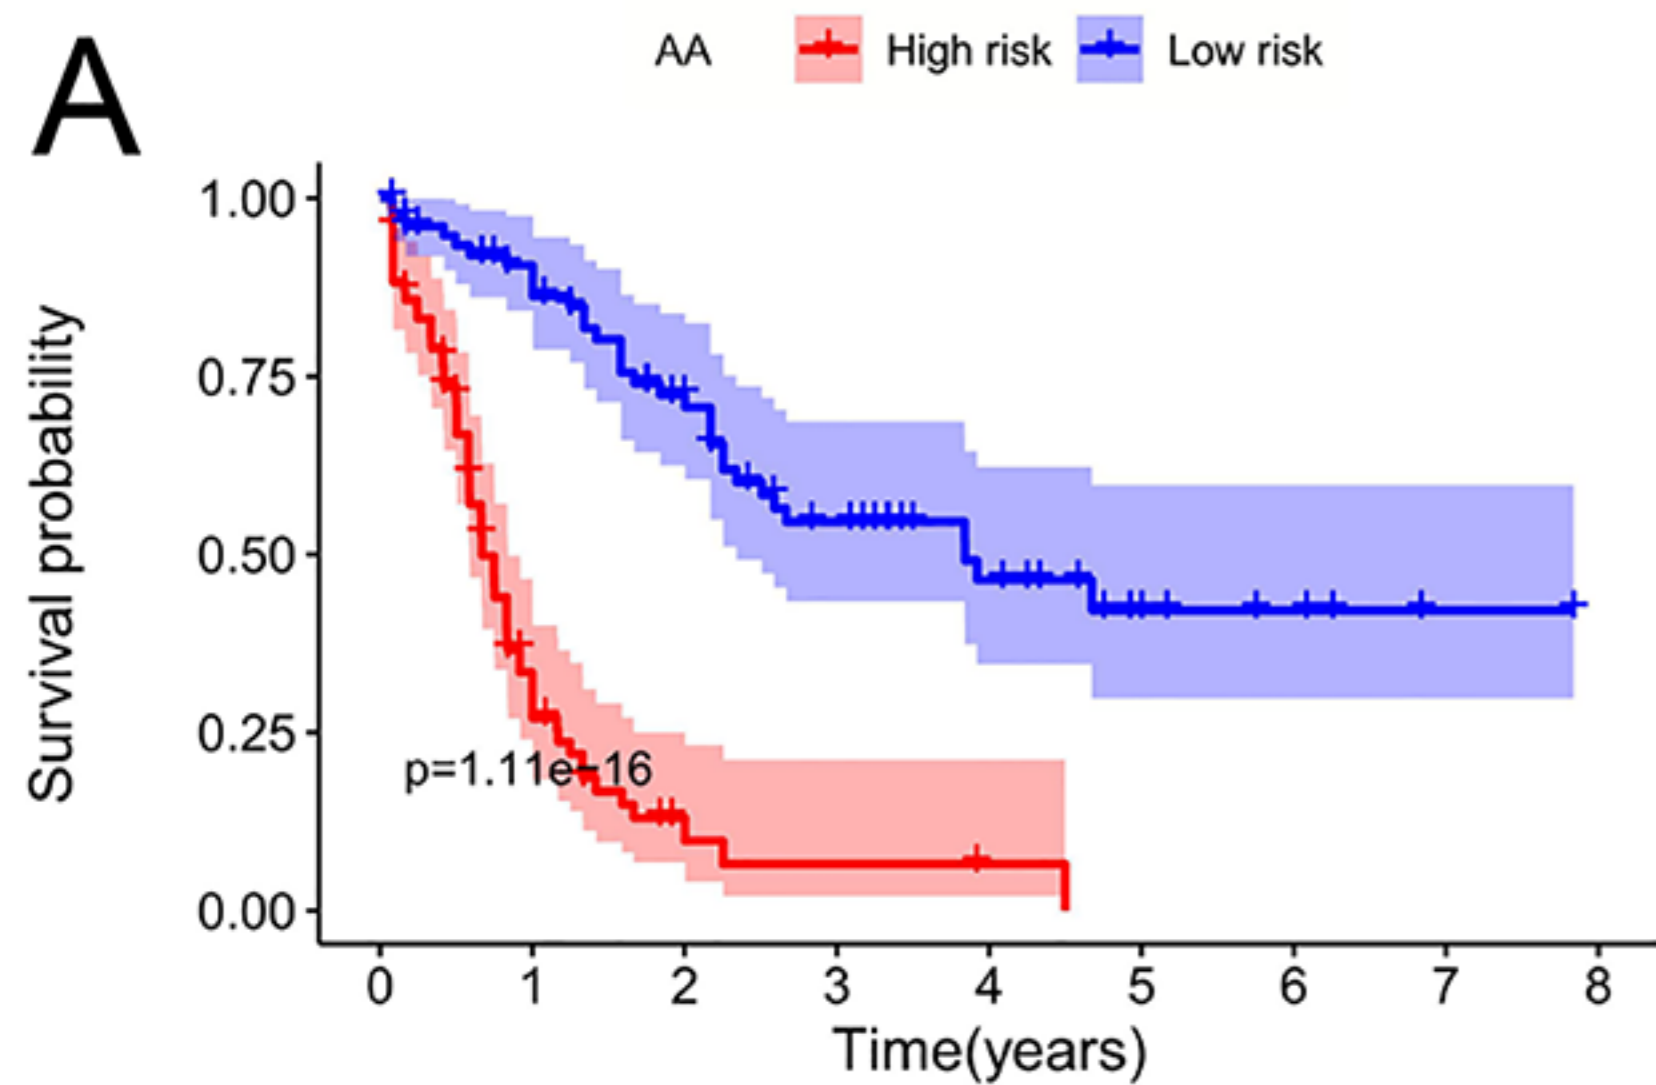

AA

|           |    |    |    |    |    |   |   |   |   |
|-----------|----|----|----|----|----|---|---|---|---|
| High risk | 78 | 21 | 4  | 2  | 1  | 0 | 0 | 0 | 0 |
| Low risk  | 78 | 63 | 43 | 28 | 17 | 8 | 4 | 1 | 0 |
|           | 0  | 1  | 2  | 3  | 4  | 5 | 6 | 7 | 8 |

Time(years)

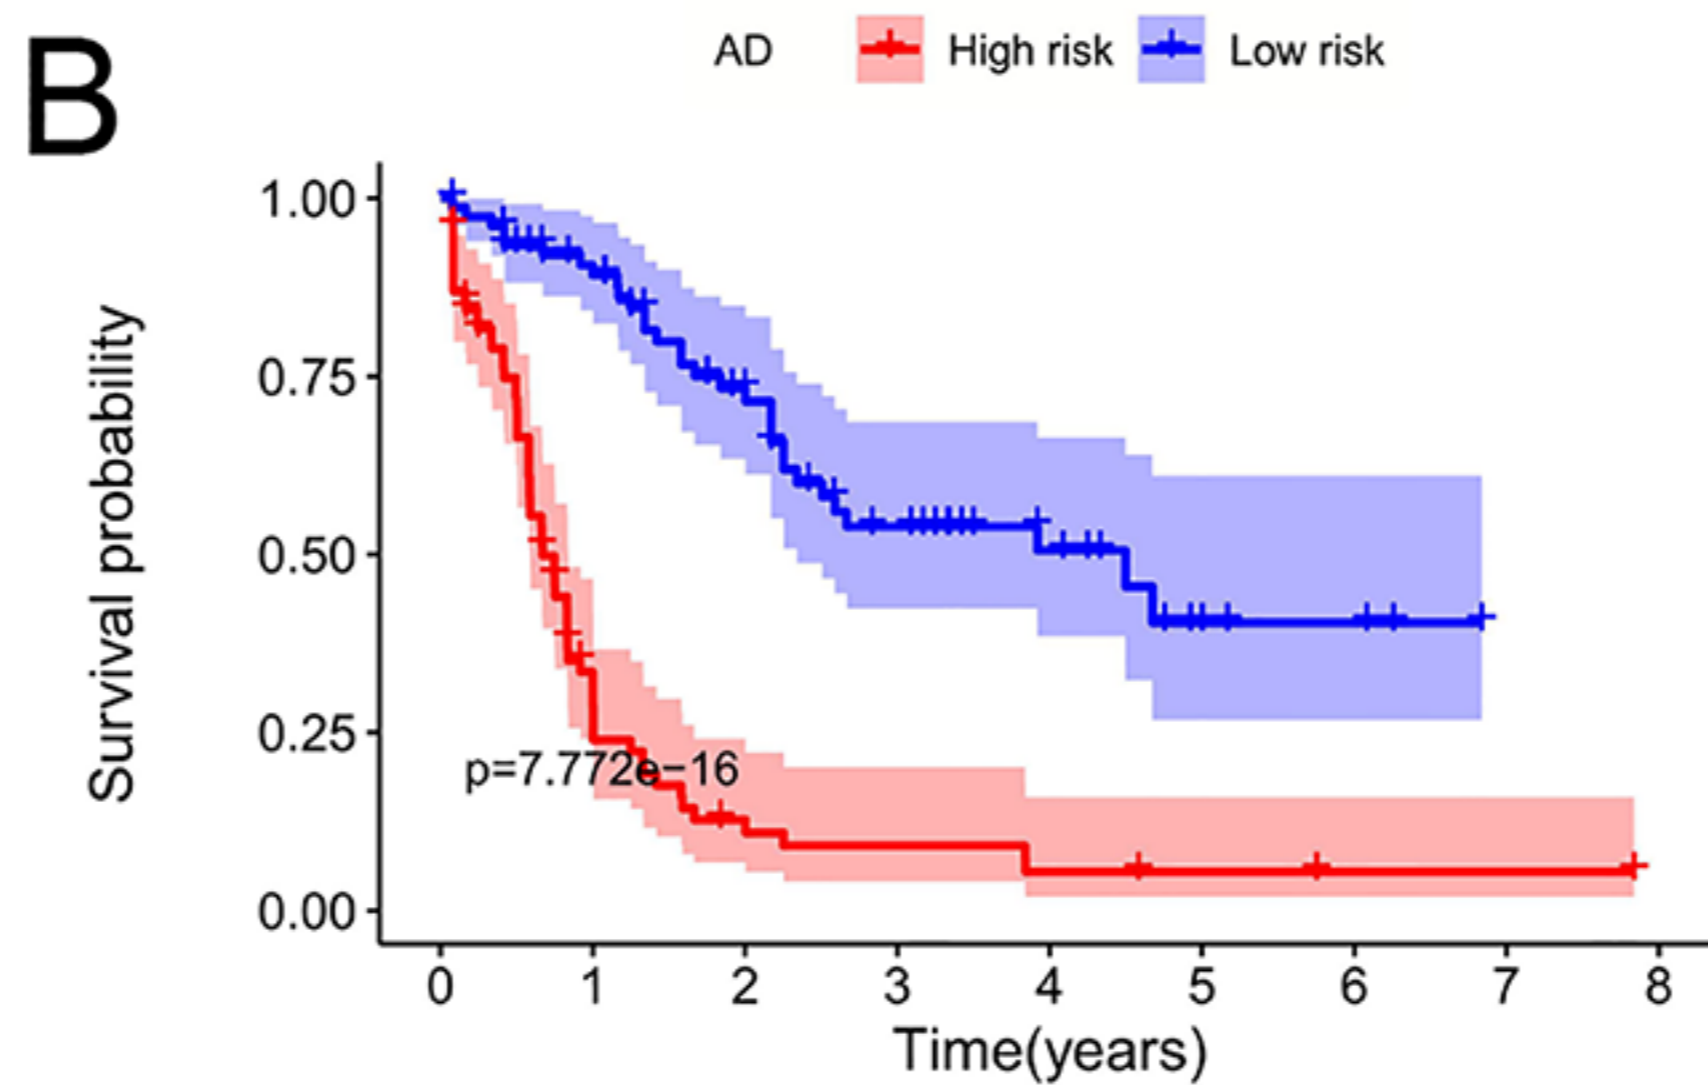

AD

|           |    |    |    |    |    |   |   |   |   |
|-----------|----|----|----|----|----|---|---|---|---|
| High risk | 78 | 21 | 7  | 5  | 3  | 2 | 1 | 1 | 0 |
| Low risk  | 78 | 63 | 40 | 25 | 15 | 6 | 3 | 0 | 0 |
|           | 0  | 1  | 2  | 3  | 4  | 5 | 6 | 7 | 8 |

Time(years)

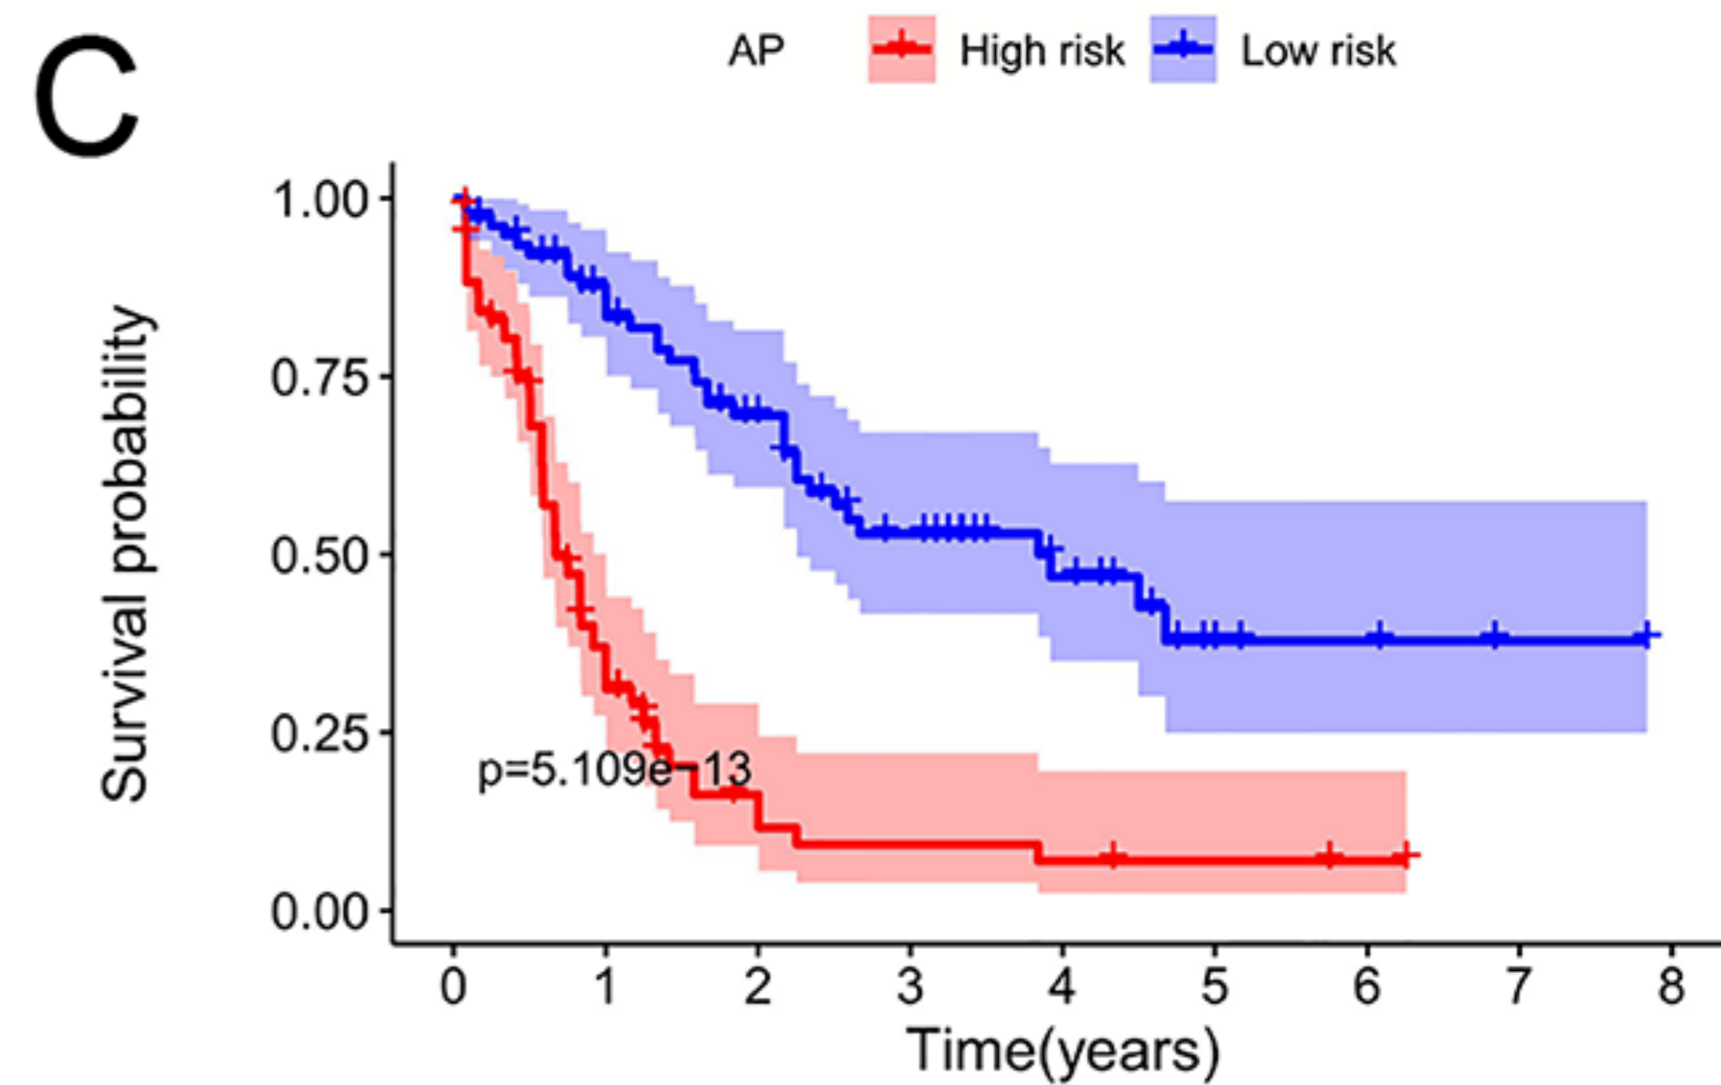

AP

|           |    |    |    |    |    |   |   |   |   |
|-----------|----|----|----|----|----|---|---|---|---|
| High risk | 78 | 25 | 7  | 4  | 3  | 2 | 1 | 0 | 0 |
| Low risk  | 78 | 59 | 40 | 26 | 15 | 6 | 3 | 1 | 0 |
|           | 0  | 1  | 2  | 3  | 4  | 5 | 6 | 7 | 8 |

Time(years)

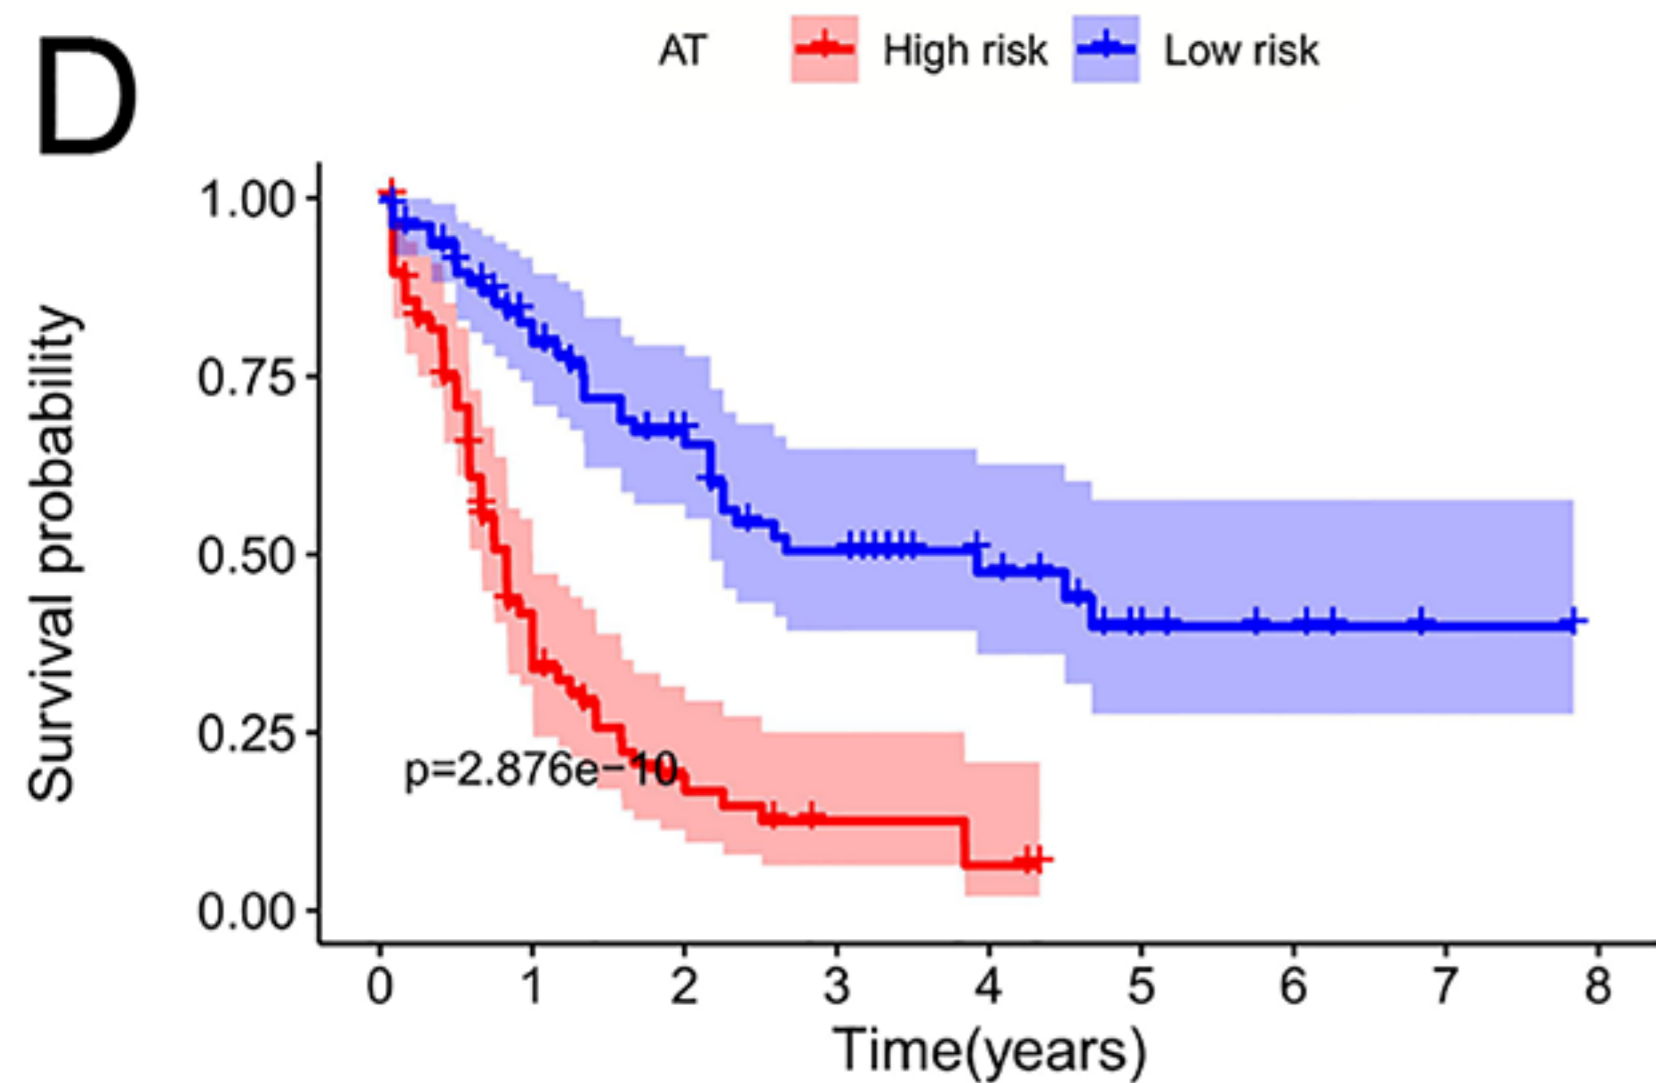

AT

|           |    |    |    |    |    |   |   |   |   |
|-----------|----|----|----|----|----|---|---|---|---|
| High risk | 78 | 27 | 9  | 4  | 2  | 0 | 0 | 0 | 0 |
| Low risk  | 78 | 57 | 38 | 26 | 16 | 8 | 4 | 1 | 0 |
|           | 0  | 1  | 2  | 3  | 4  | 5 | 6 | 7 | 8 |

Time(years)

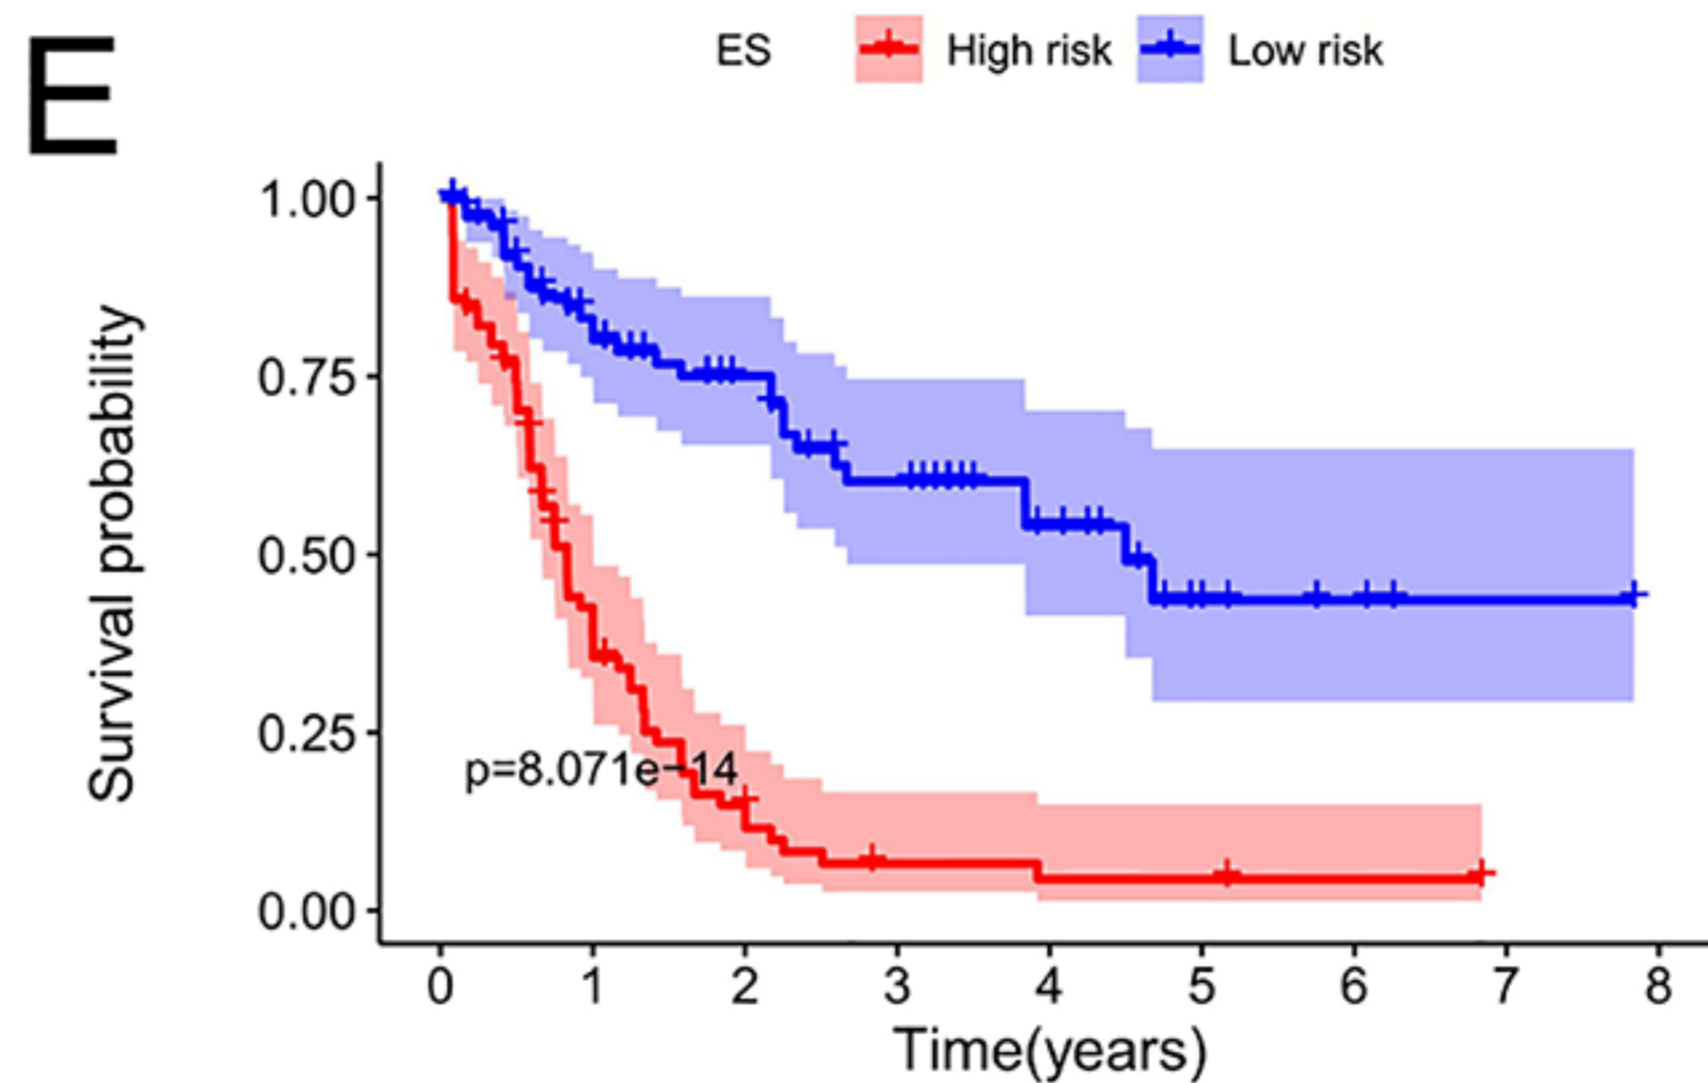

ES

|           |    |    |    |    |    |   |   |   |   |
|-----------|----|----|----|----|----|---|---|---|---|
| High risk | 78 | 30 | 10 | 3  | 2  | 2 | 1 | 0 | 0 |
| Low risk  | 78 | 54 | 37 | 27 | 16 | 6 | 3 | 1 | 0 |
|           | 0  | 1  | 2  | 3  | 4  | 5 | 6 | 7 | 8 |

Time(years)

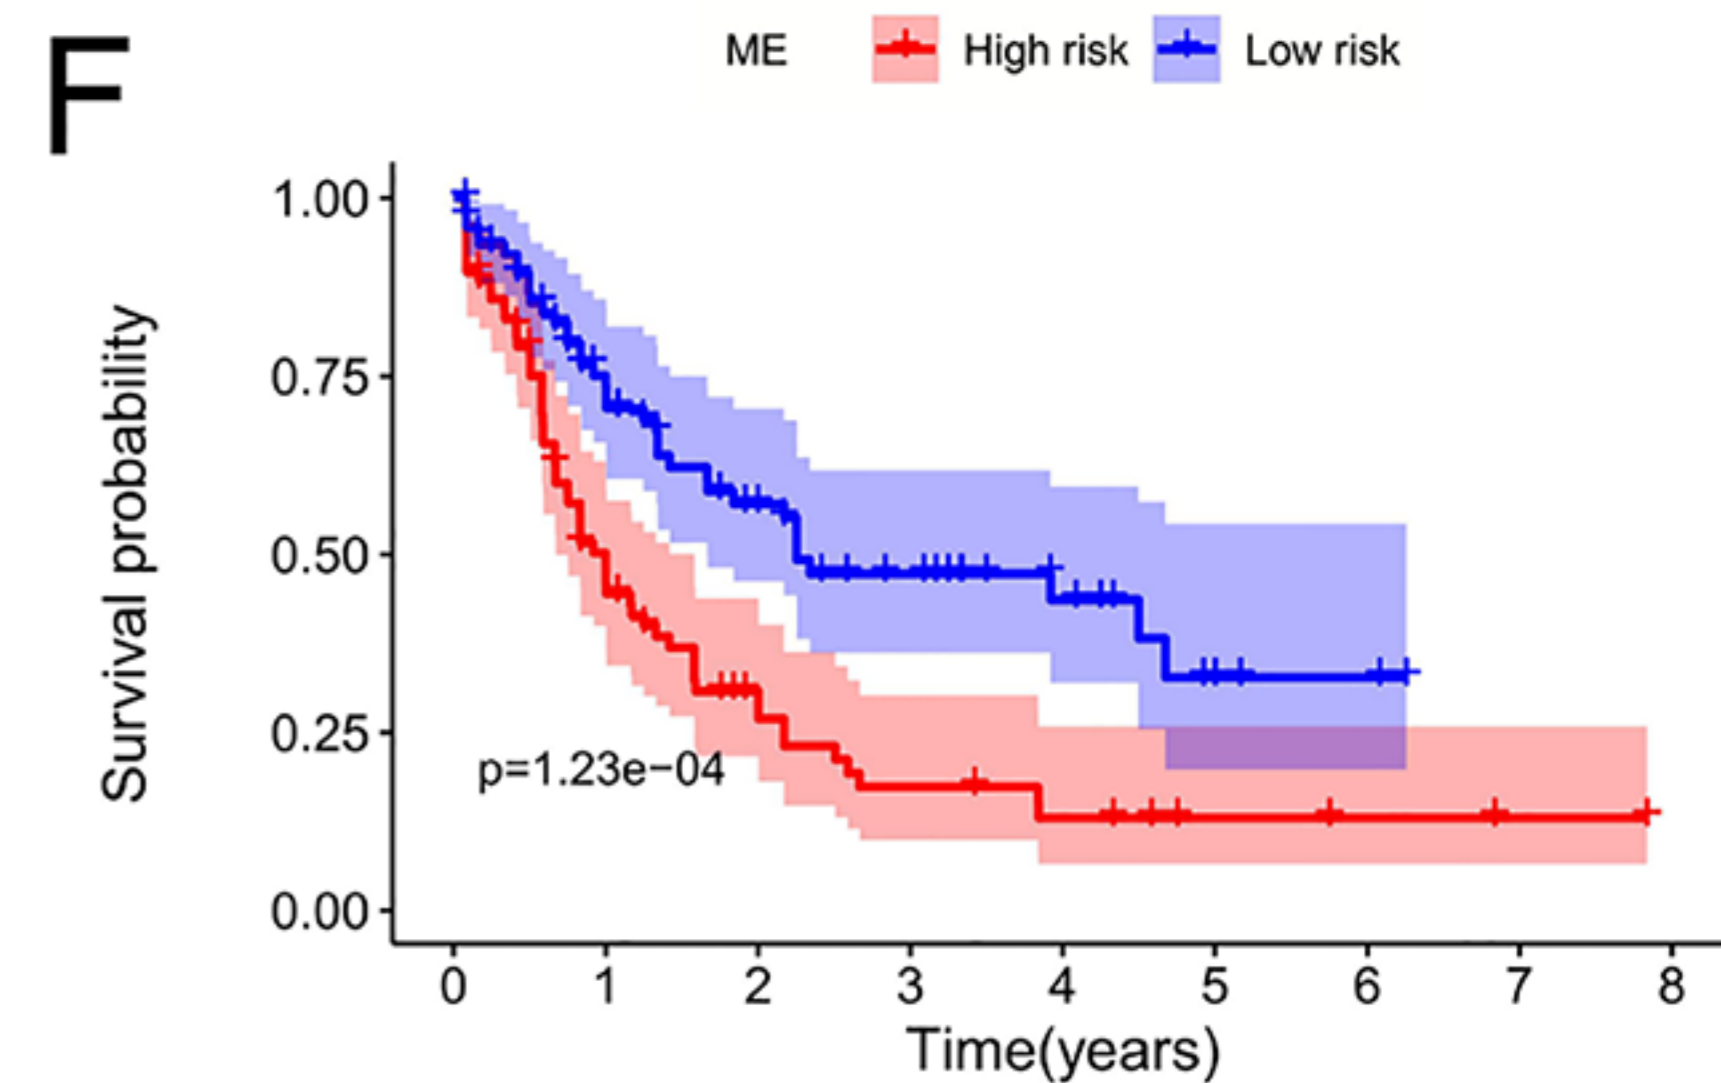

ME

|           |    |    |    |    |    |   |   |   |   |
|-----------|----|----|----|----|----|---|---|---|---|
| High risk | 78 | 35 | 16 | 9  | 6  | 3 | 2 | 1 | 0 |
| Low risk  | 78 | 49 | 31 | 21 | 12 | 5 | 2 | 0 | 0 |
|           | 0  | 1  | 2  | 3  | 4  | 5 | 6 | 7 | 8 |

Time(years)

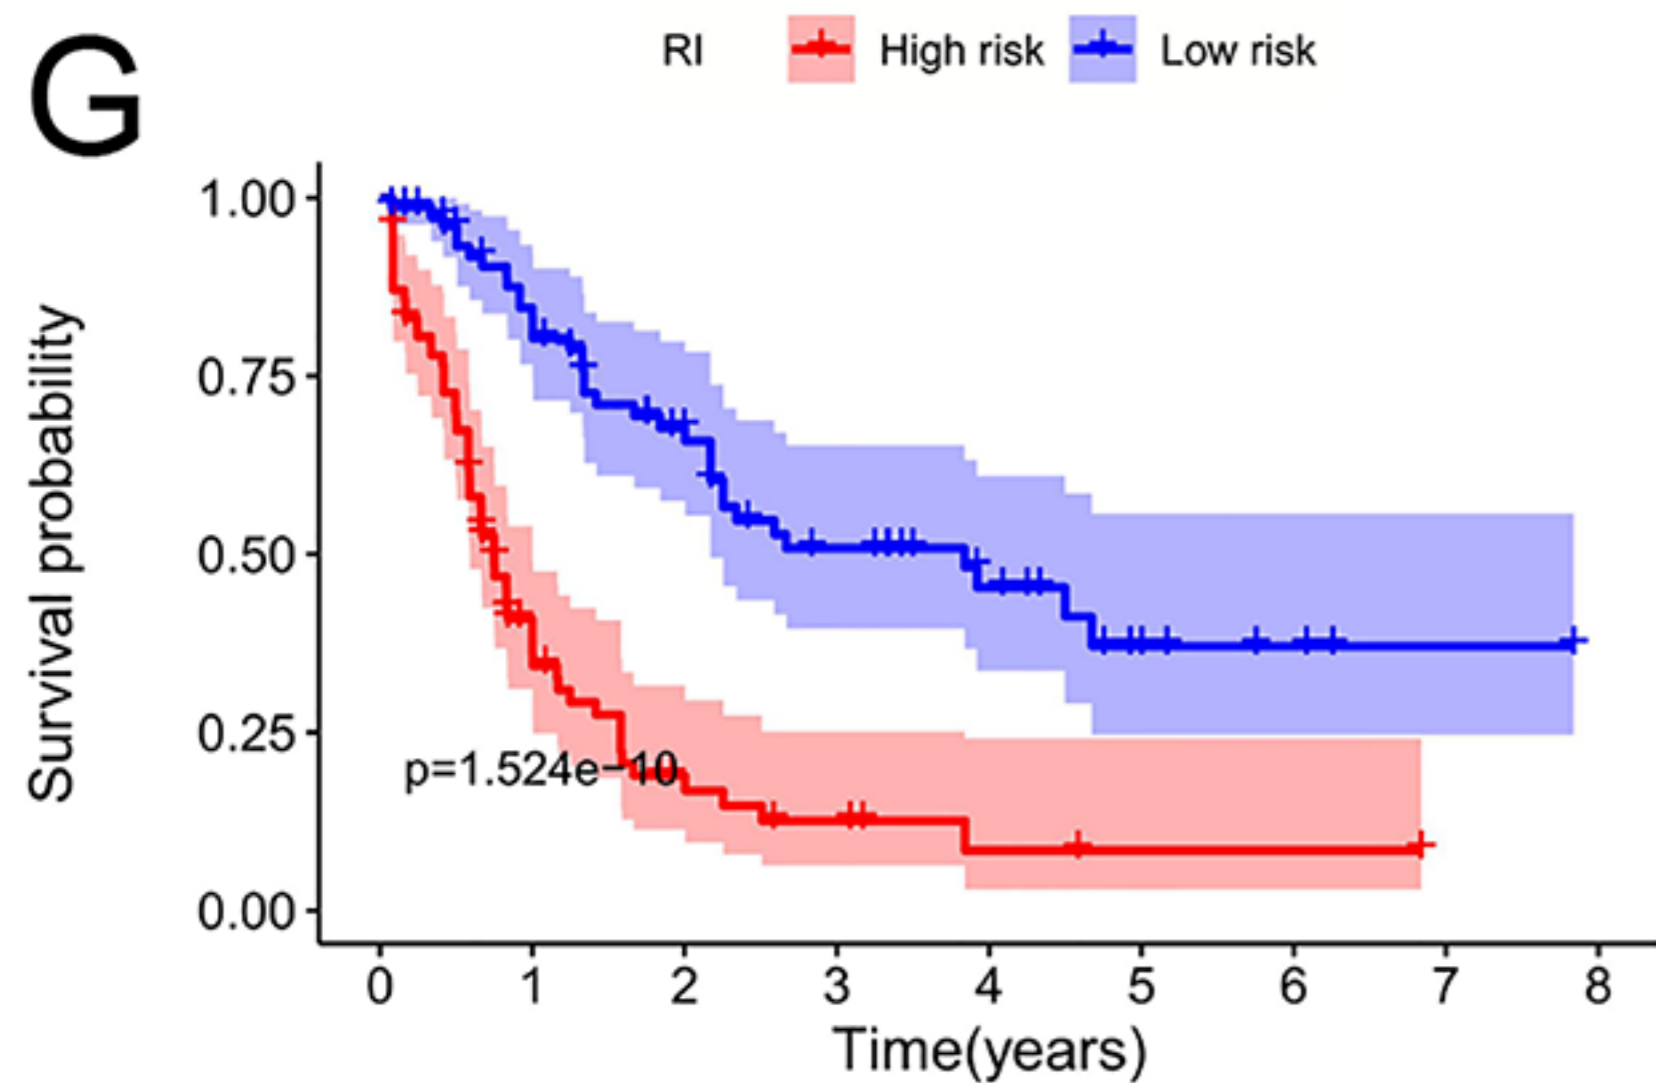

RI

|           |    |    |    |    |    |   |   |   |   |
|-----------|----|----|----|----|----|---|---|---|---|
| High risk | 78 | 25 | 9  | 5  | 2  | 1 | 1 | 0 | 0 |
| Low risk  | 78 | 59 | 38 | 25 | 16 | 7 | 3 | 1 | 0 |
|           | 0  | 1  | 2  | 3  | 4  | 5 | 6 | 7 | 8 |

Time(years)

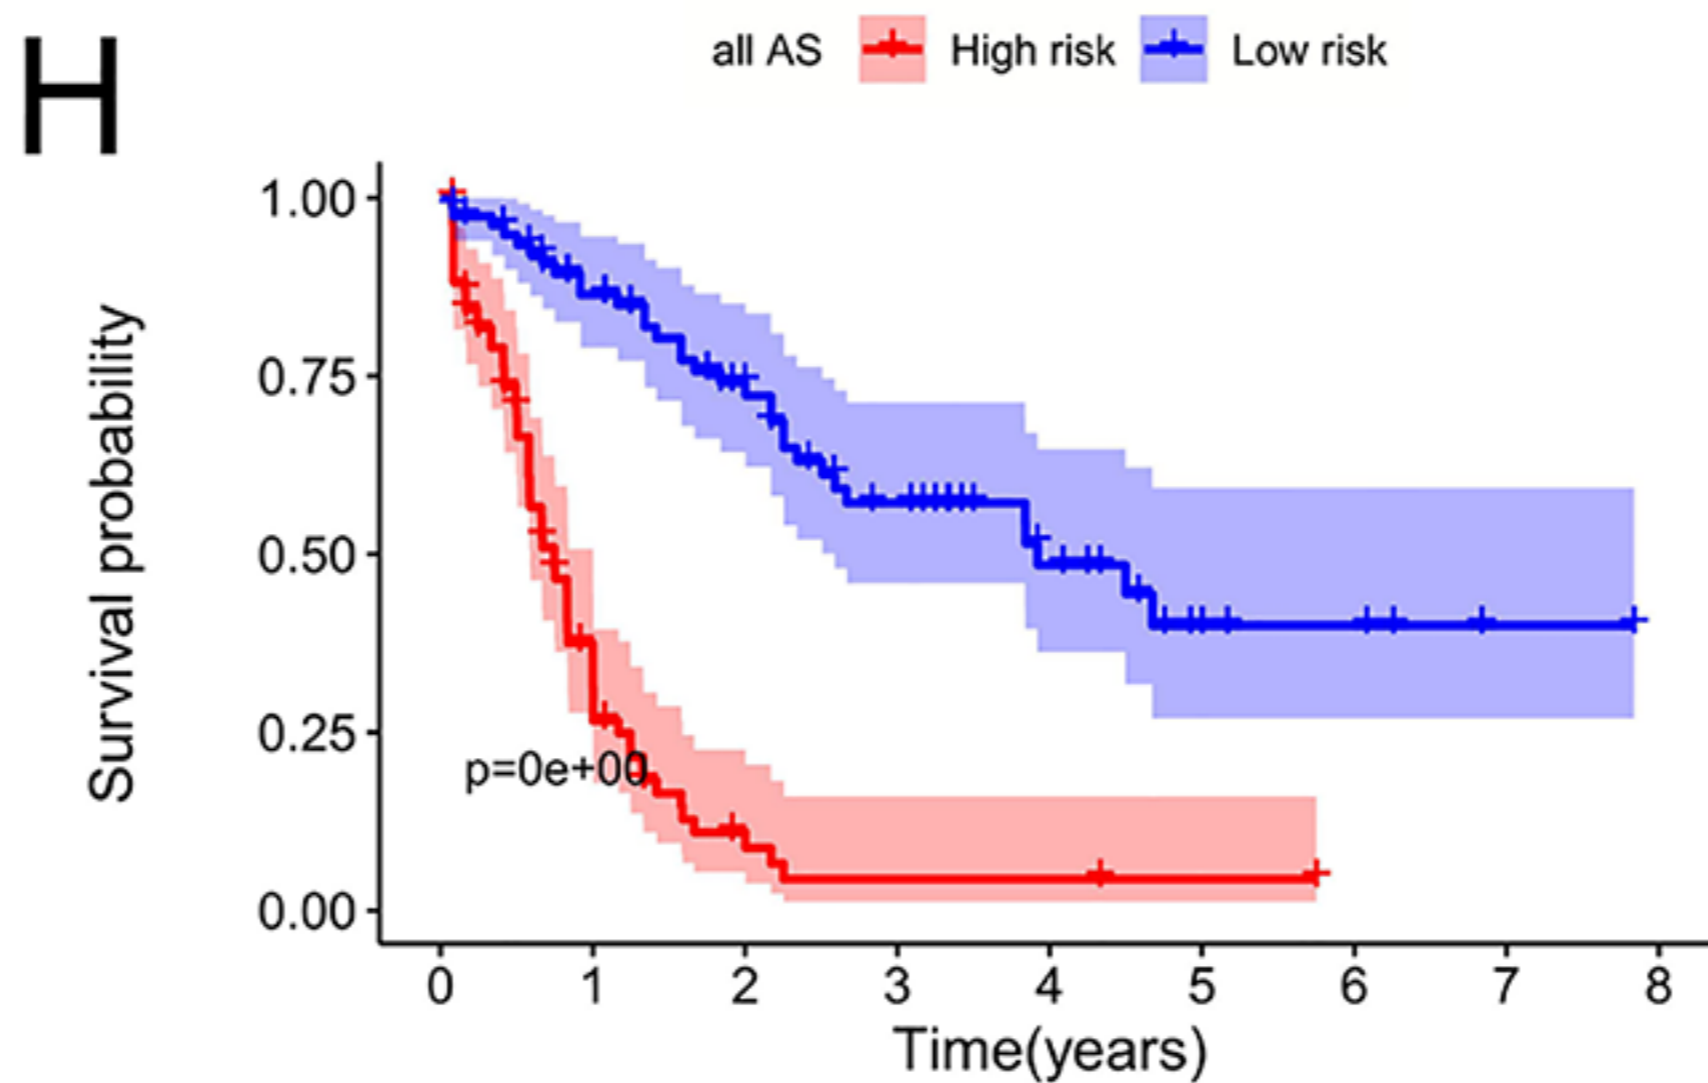

all AS

|           |    |    |    |    |    |   |   |   |   |
|-----------|----|----|----|----|----|---|---|---|---|
| High risk | 78 | 24 | 5  | 2  | 2  | 1 | 0 | 0 | 0 |
| Low risk  | 78 | 60 | 42 | 28 | 16 | 7 | 4 | 1 | 0 |
|           | 0  | 1  | 2  | 3  | 4  | 5 | 6 | 7 | 8 |

Time(years)

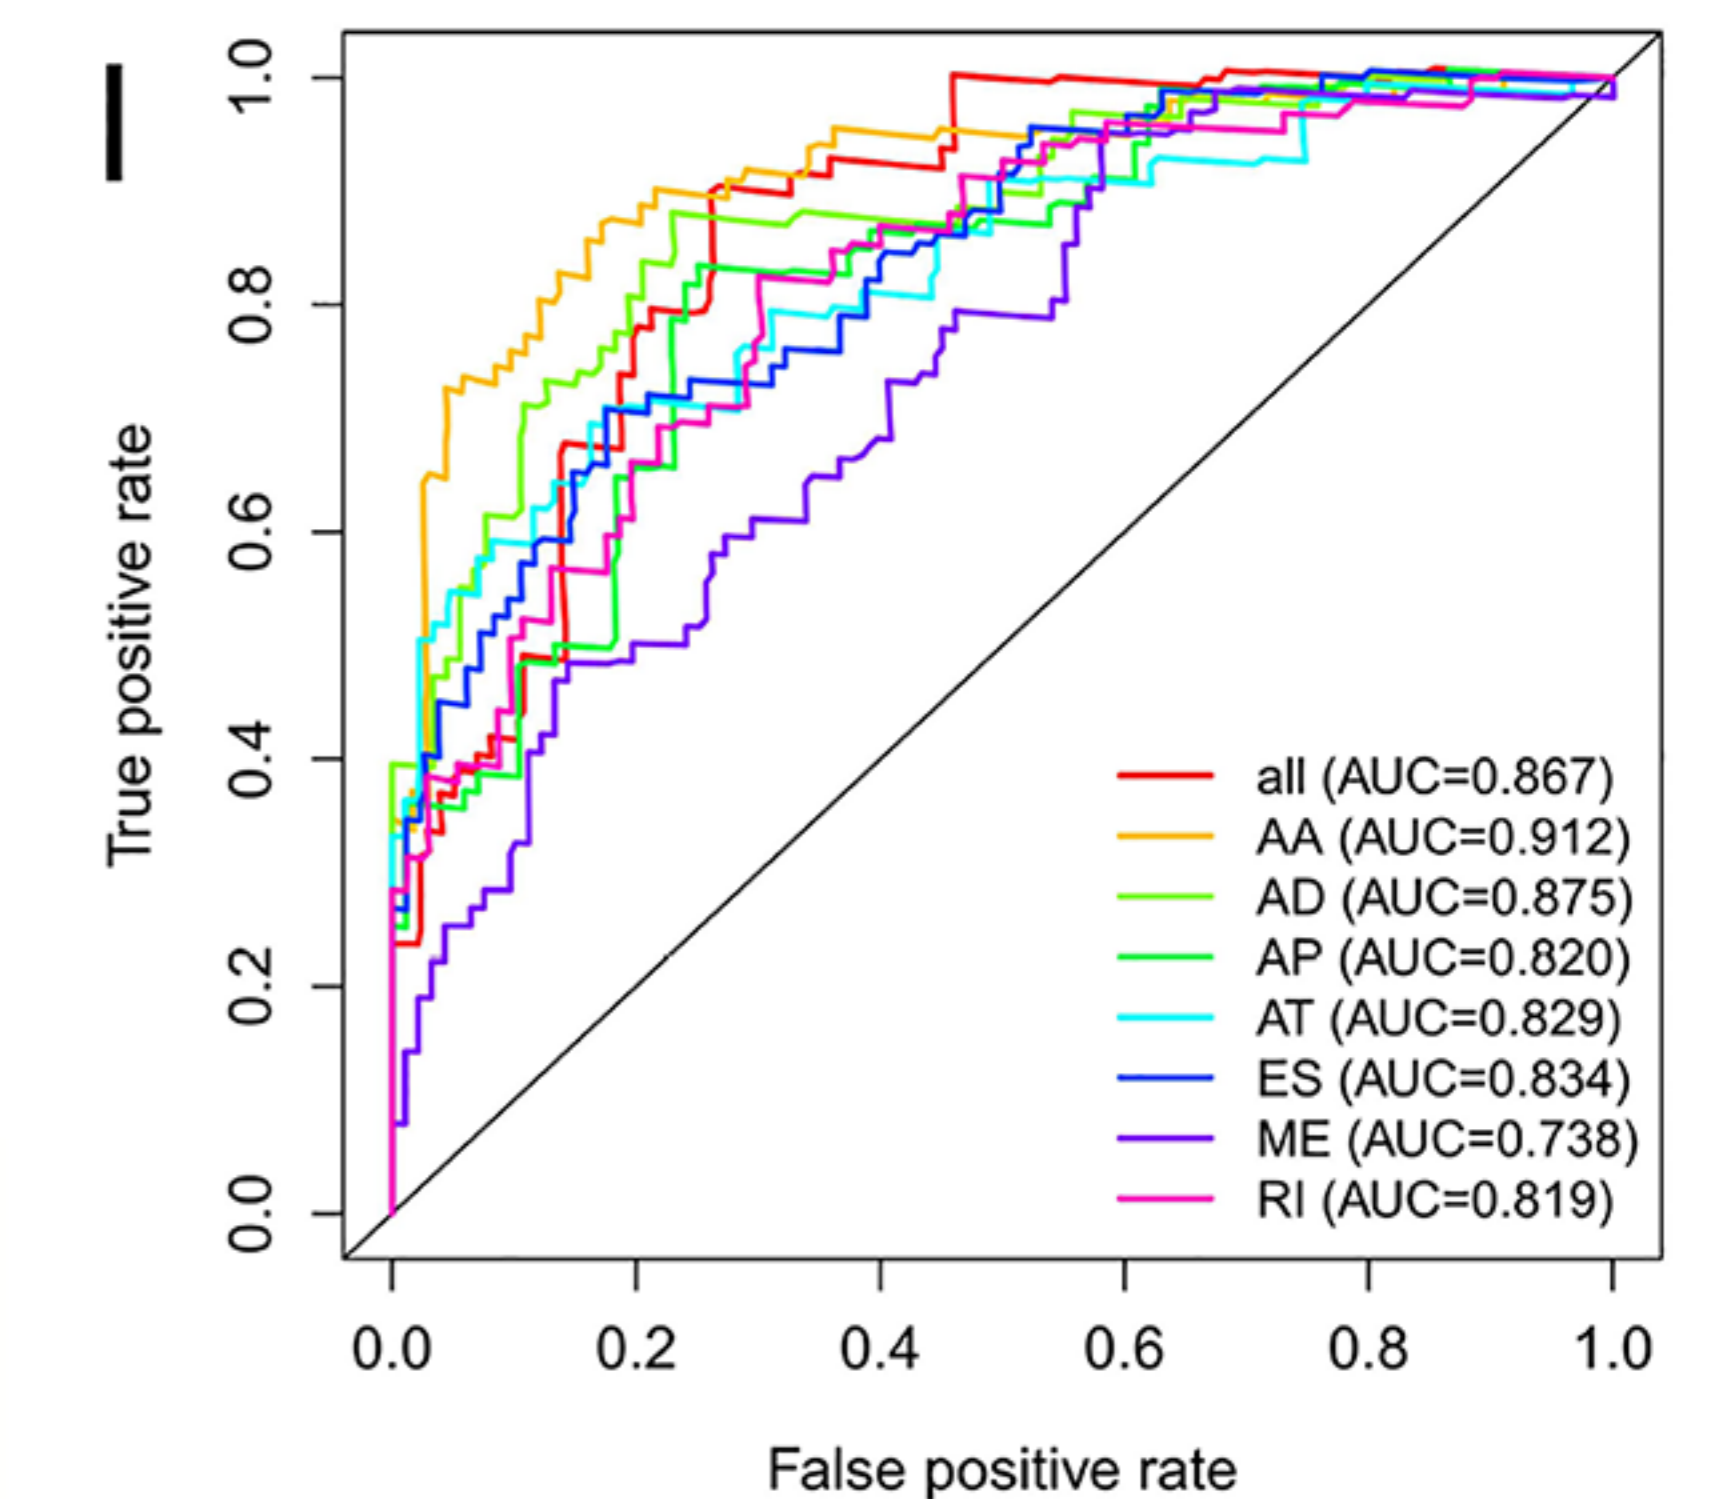

Supplement: 13578_2020_481_MOESM4_ESM.pdf [file 13578_2020_481_MOESM4_ESM.pdf]
