# Supplementary material for: Clusterization in acute myeloid leukemia based on prognostic alternative splicing signature to reveal the clinical characteristics in the bone marrow microenvironment
Source: PubMed Central journal article supplement (PMC7552347; doi:10.1186/s13578-020-00481-5), 2020-10-12

**A**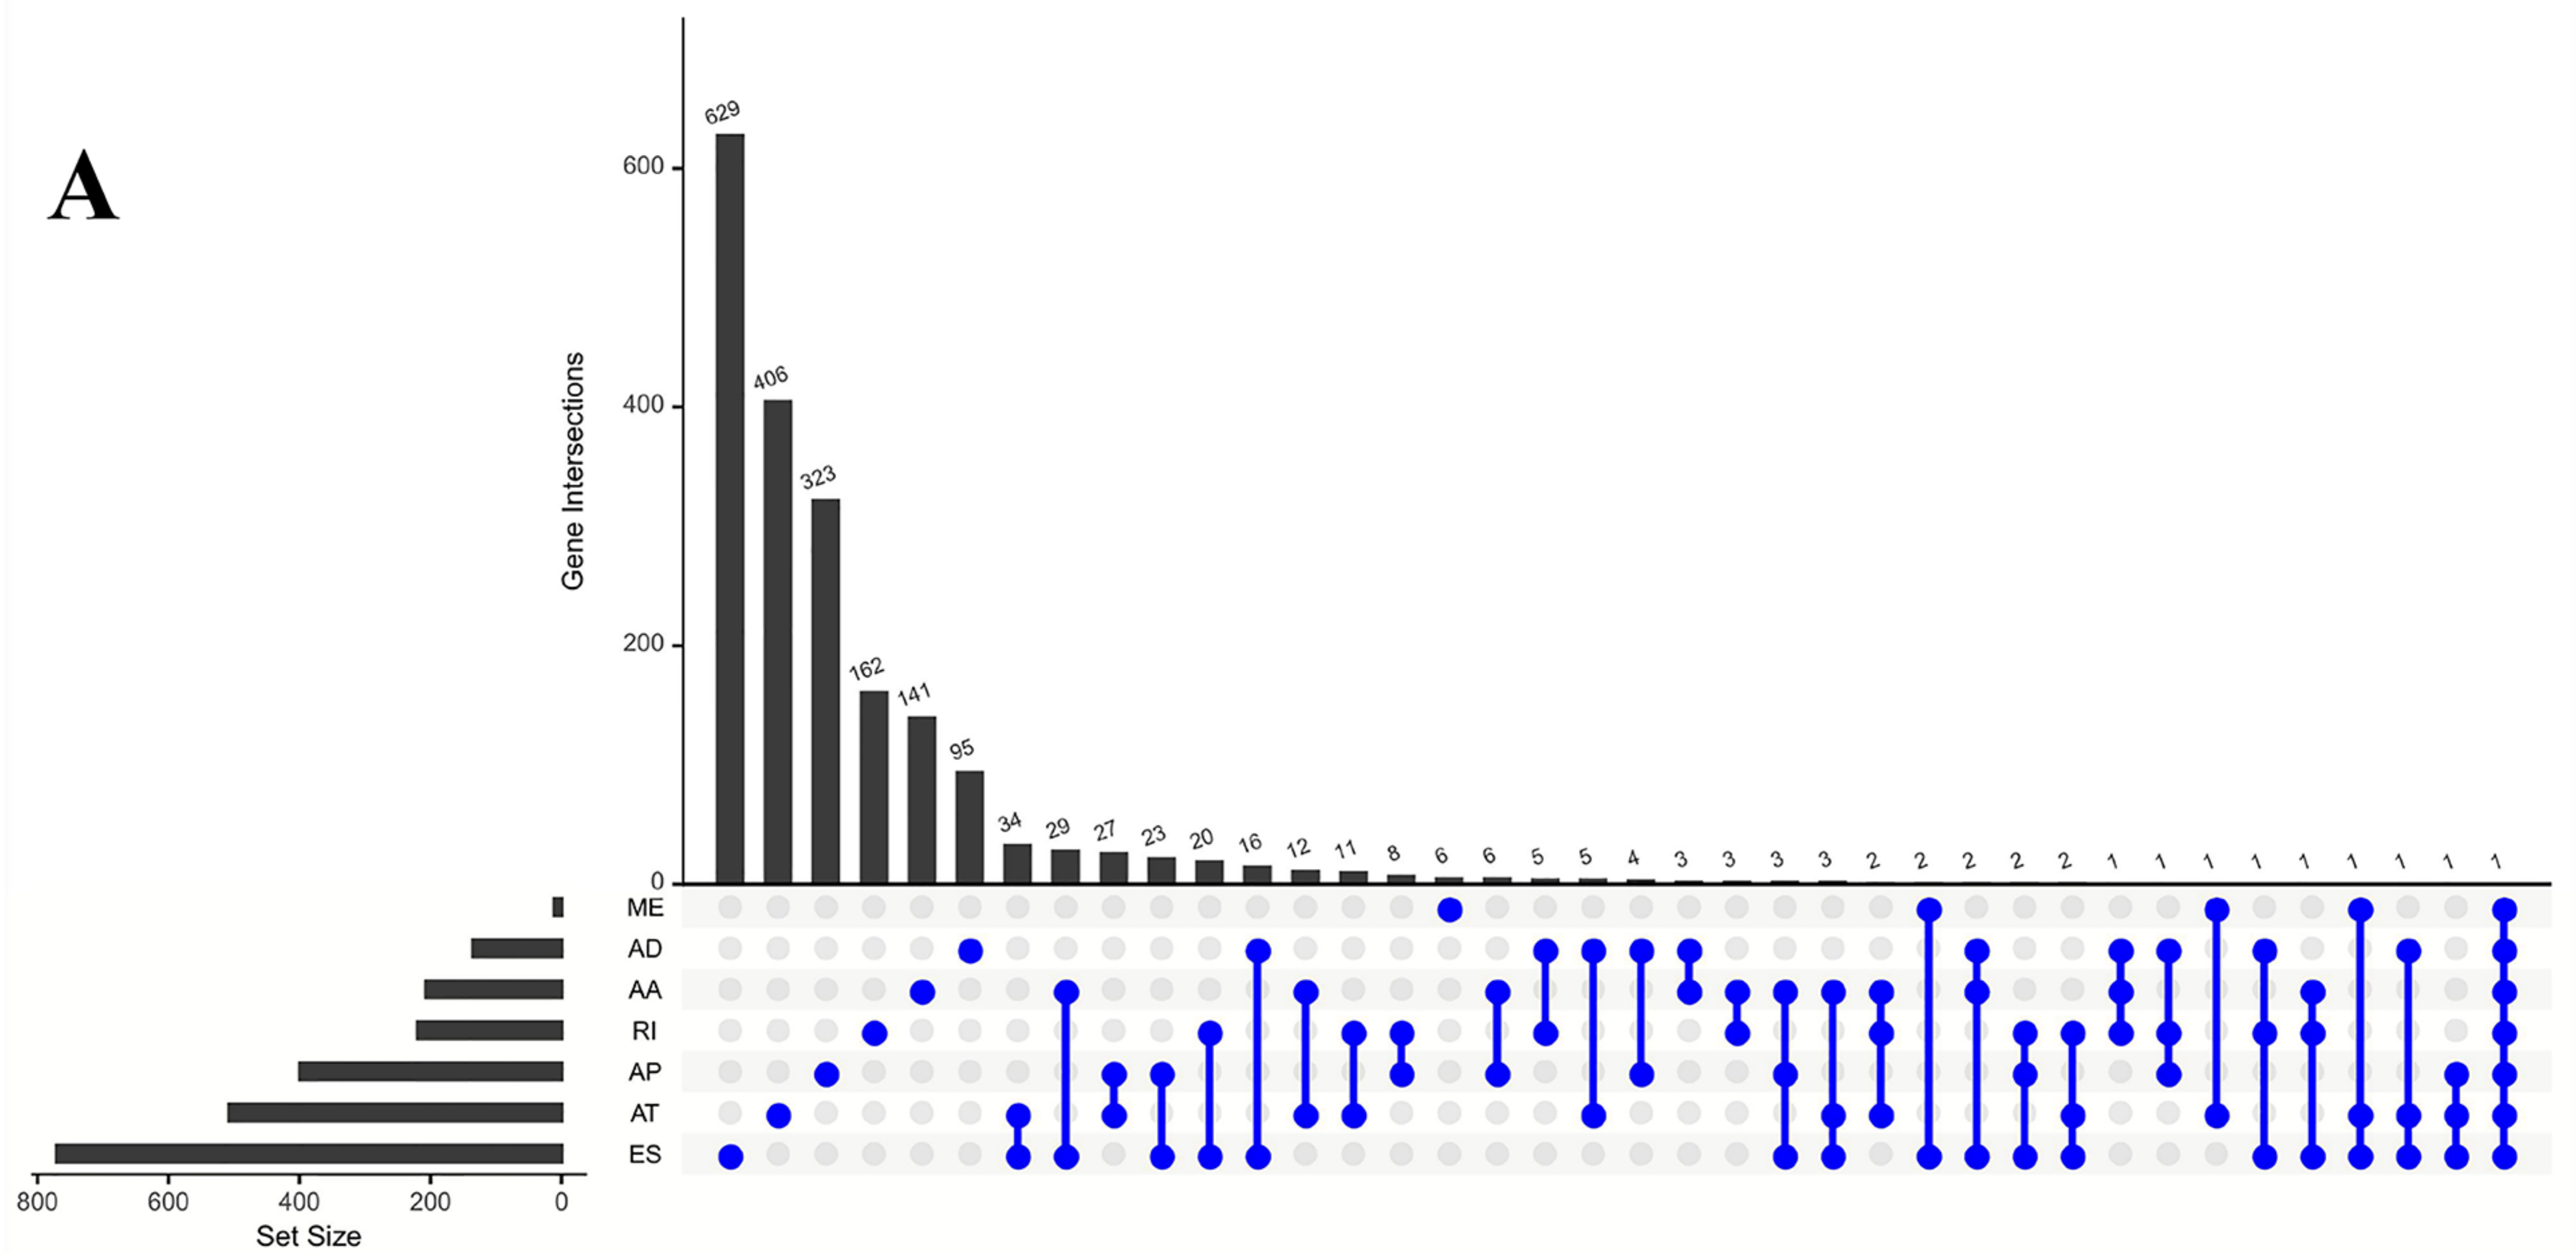**B**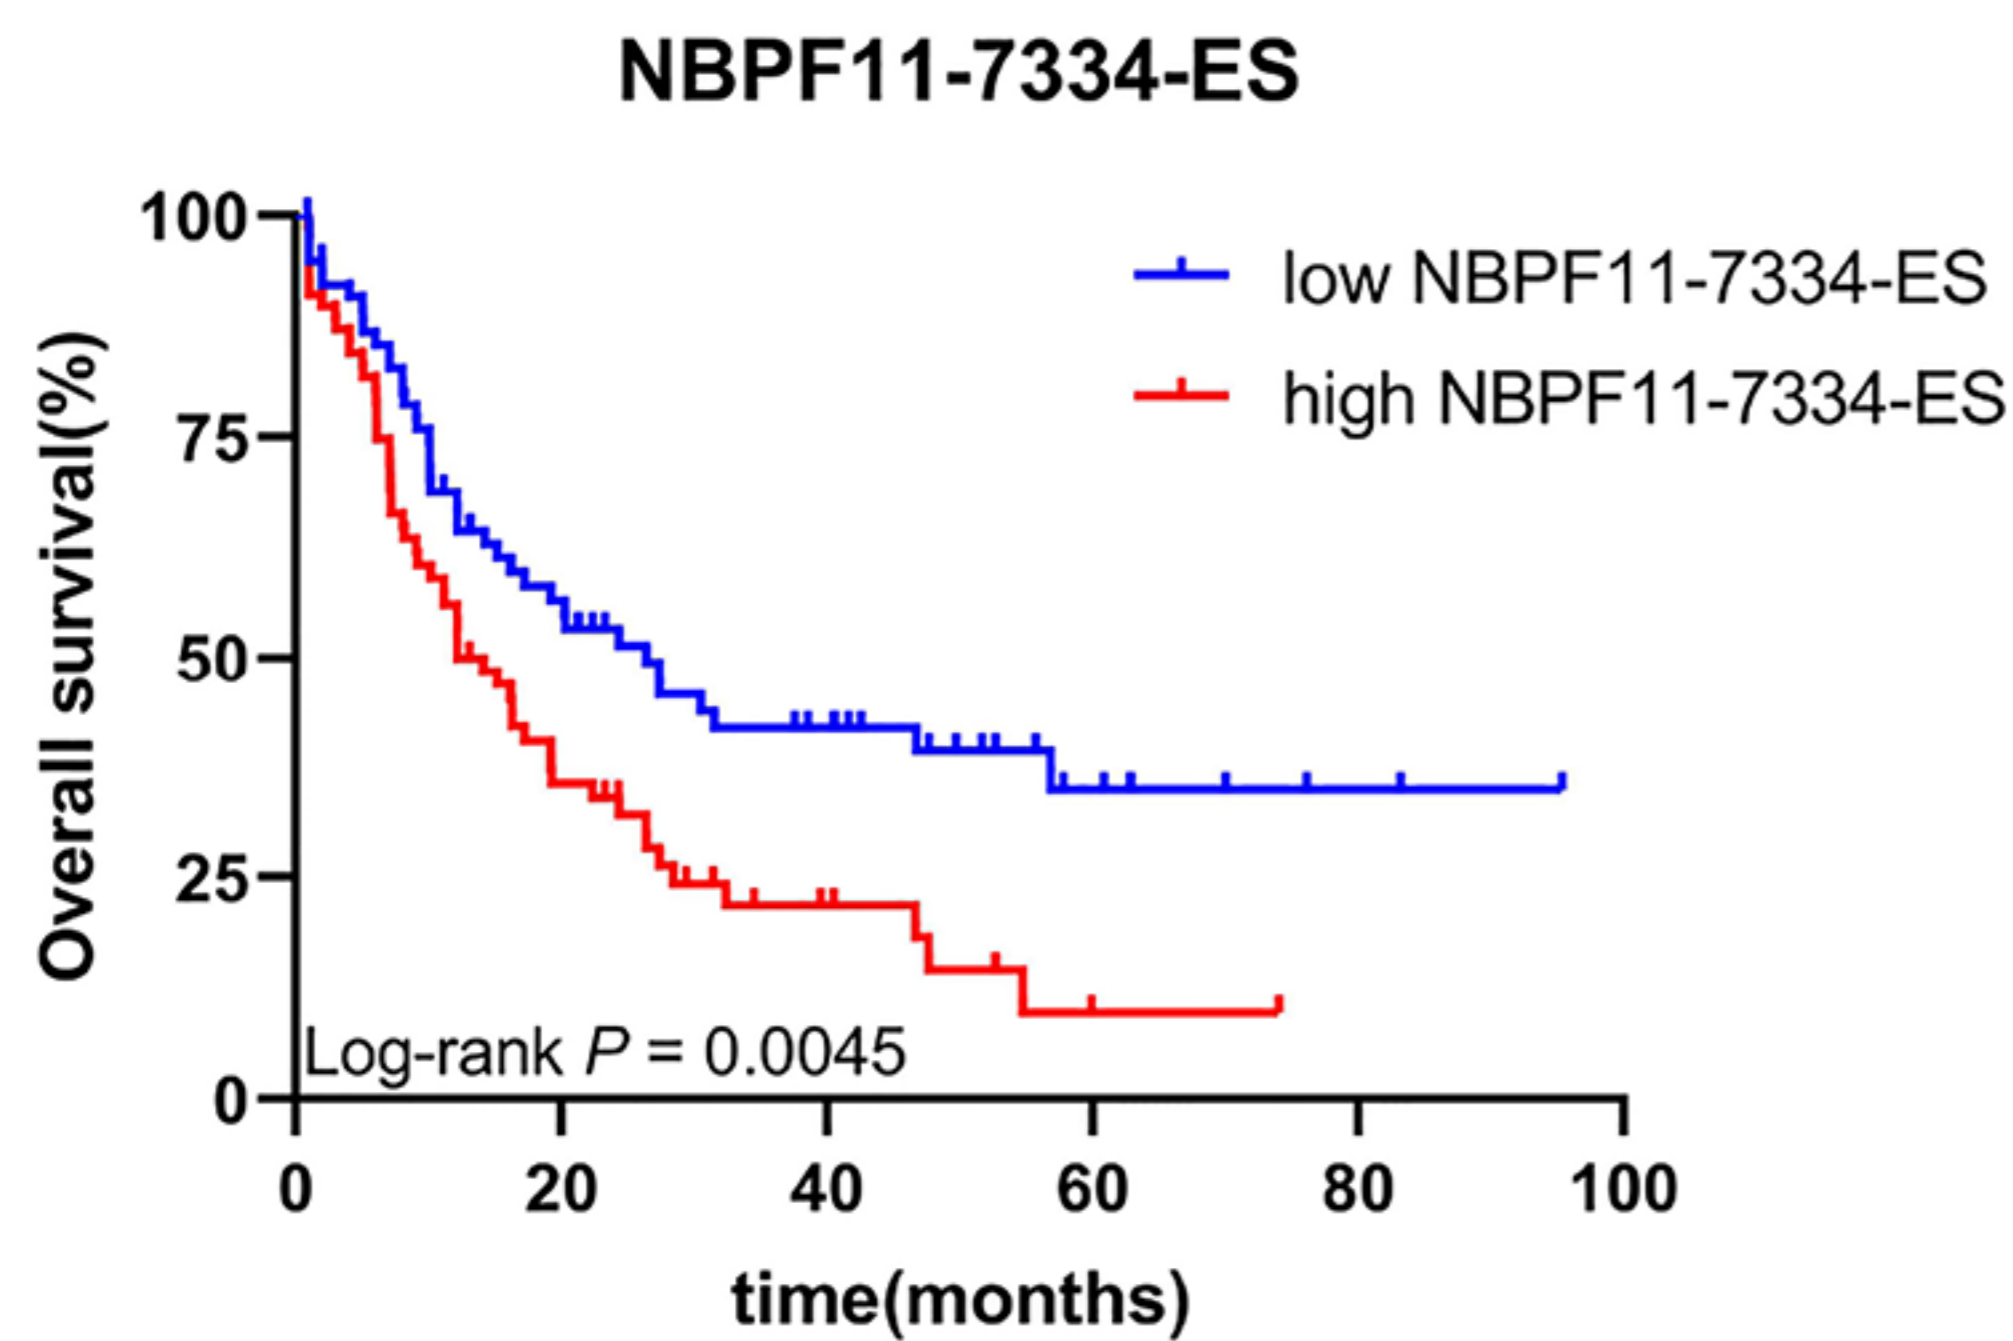**C**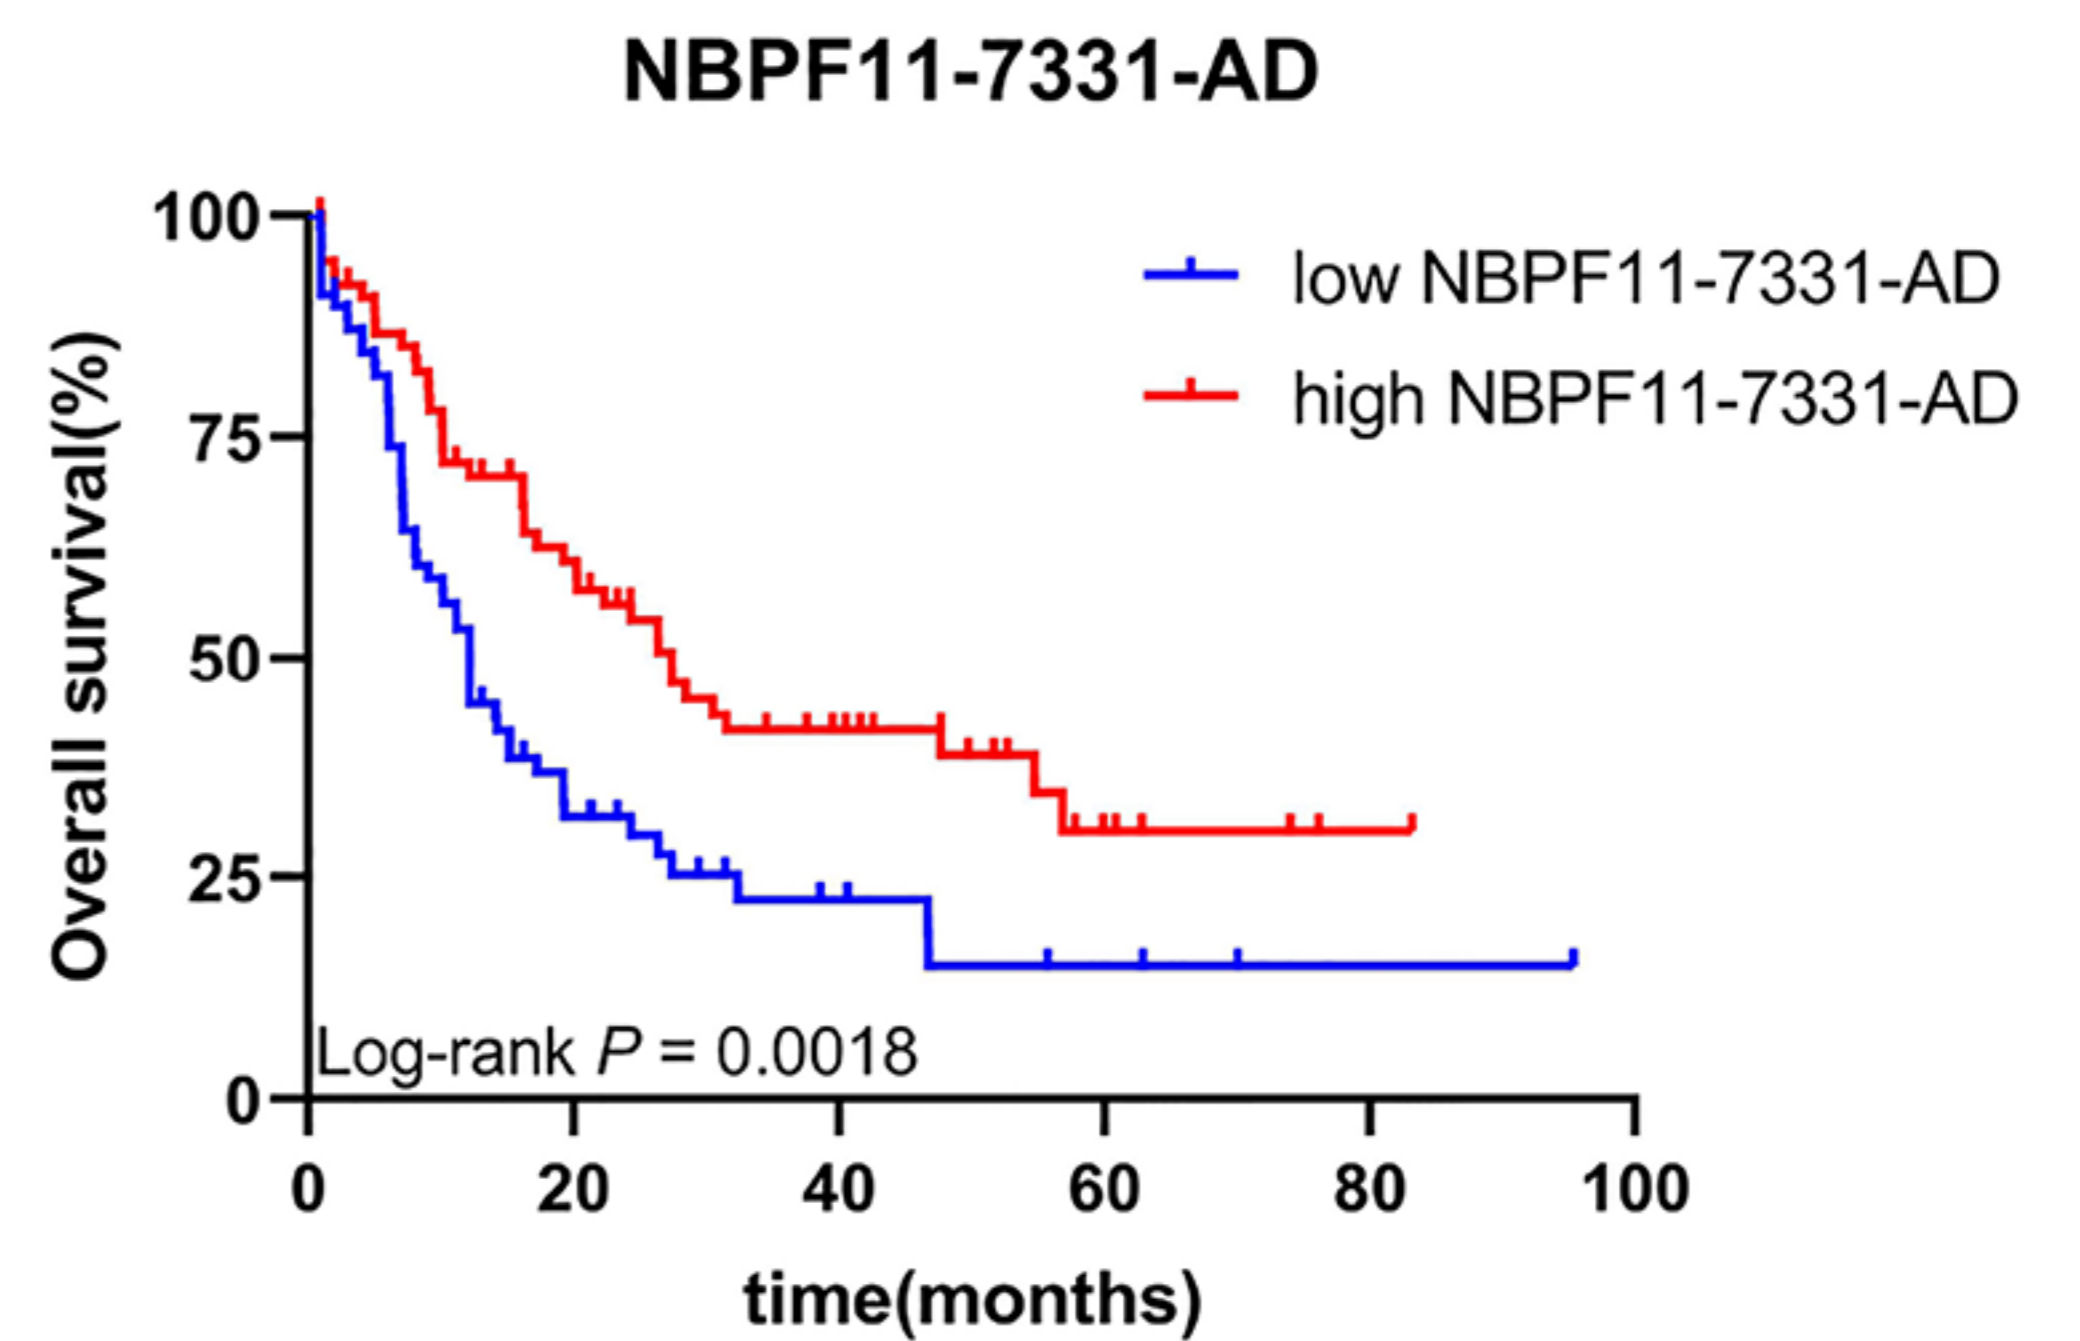**D**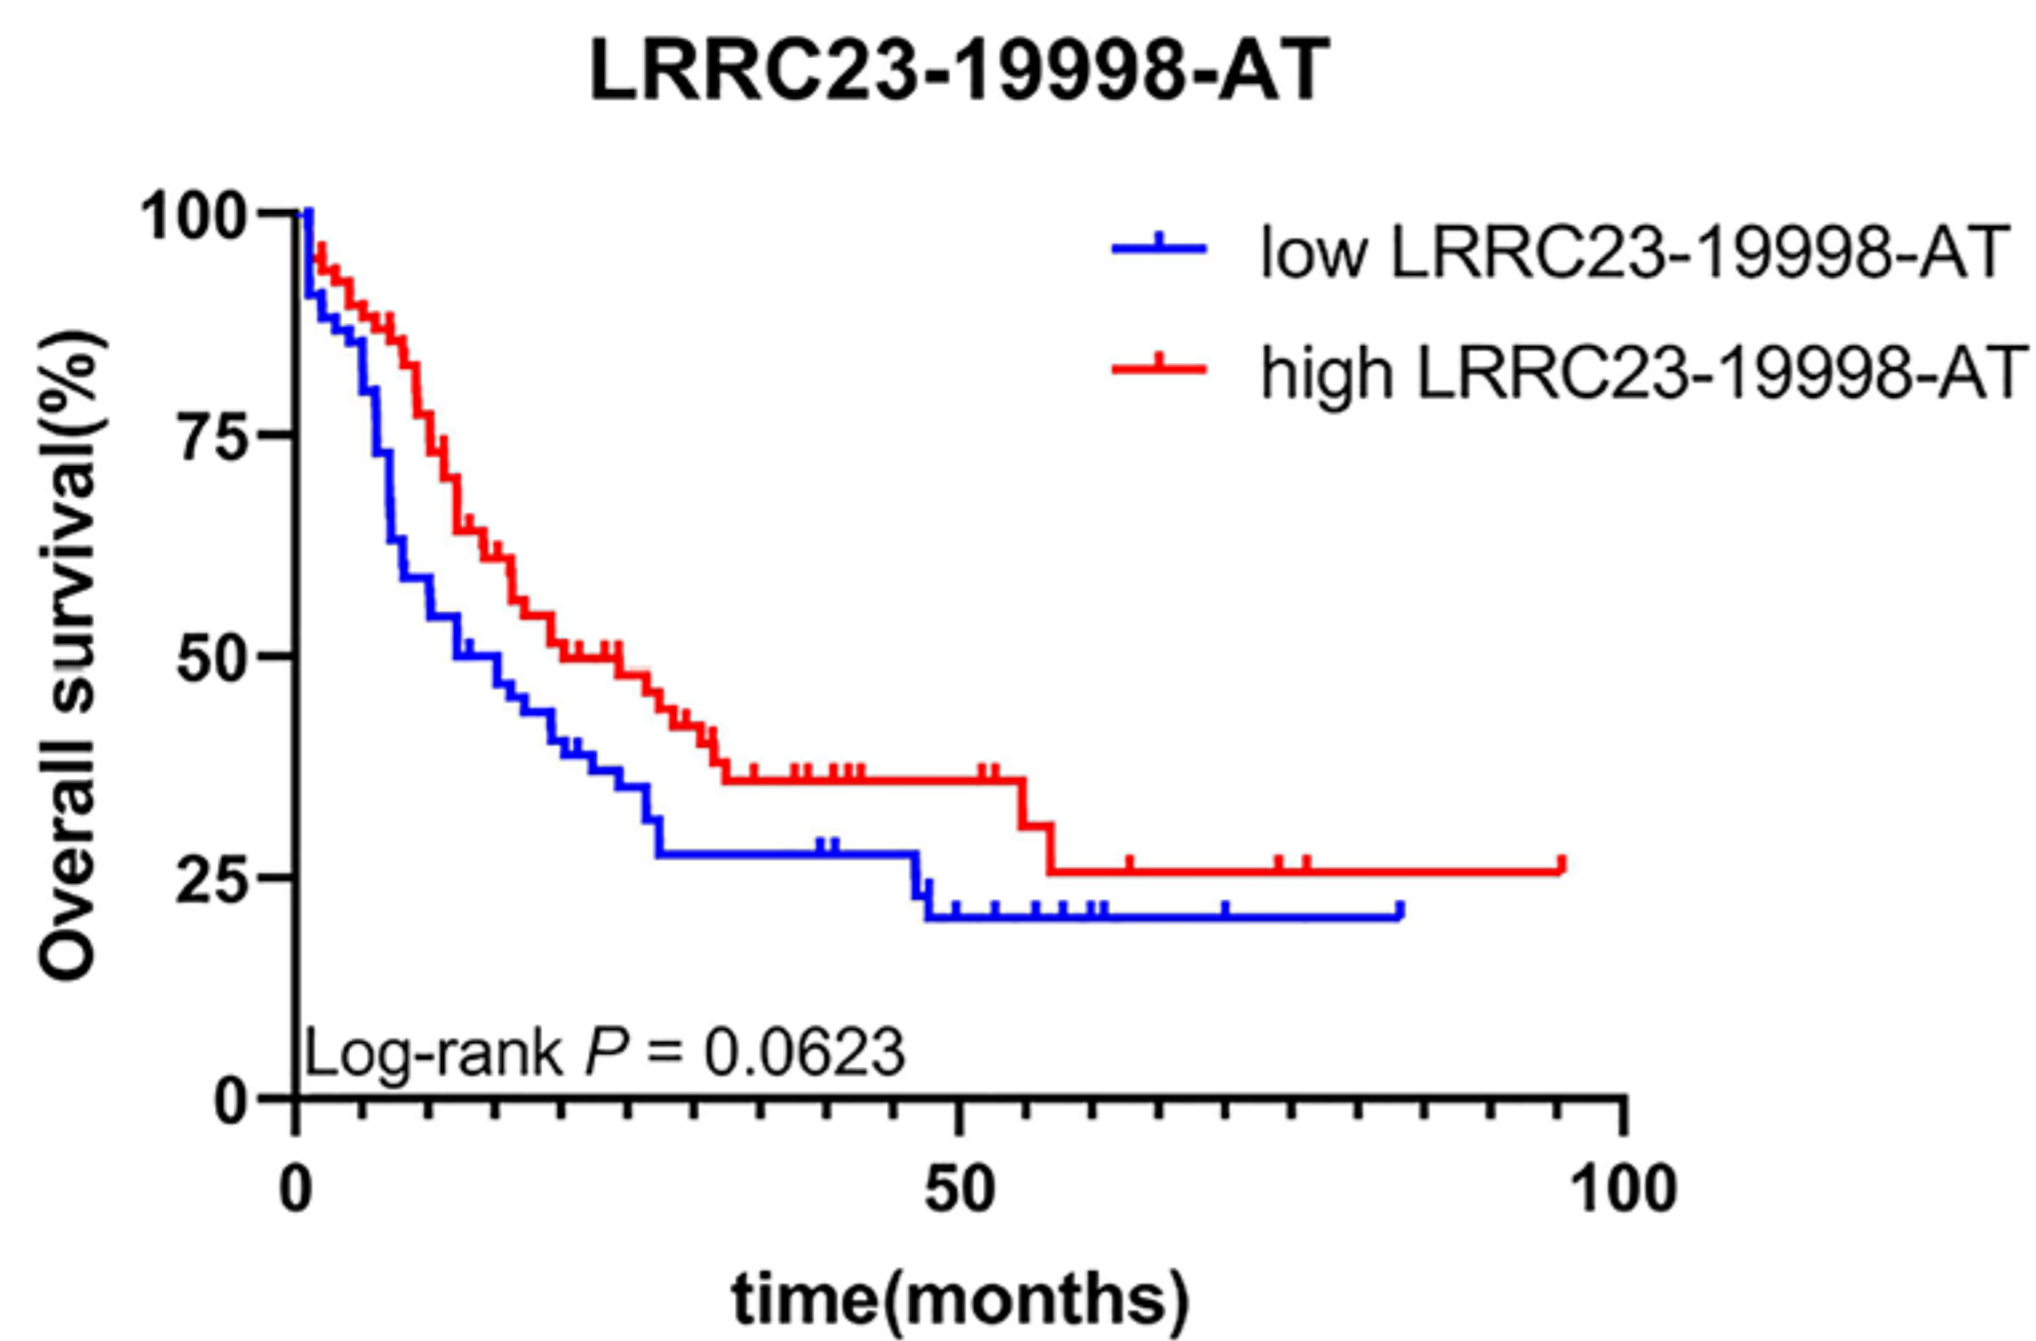**E**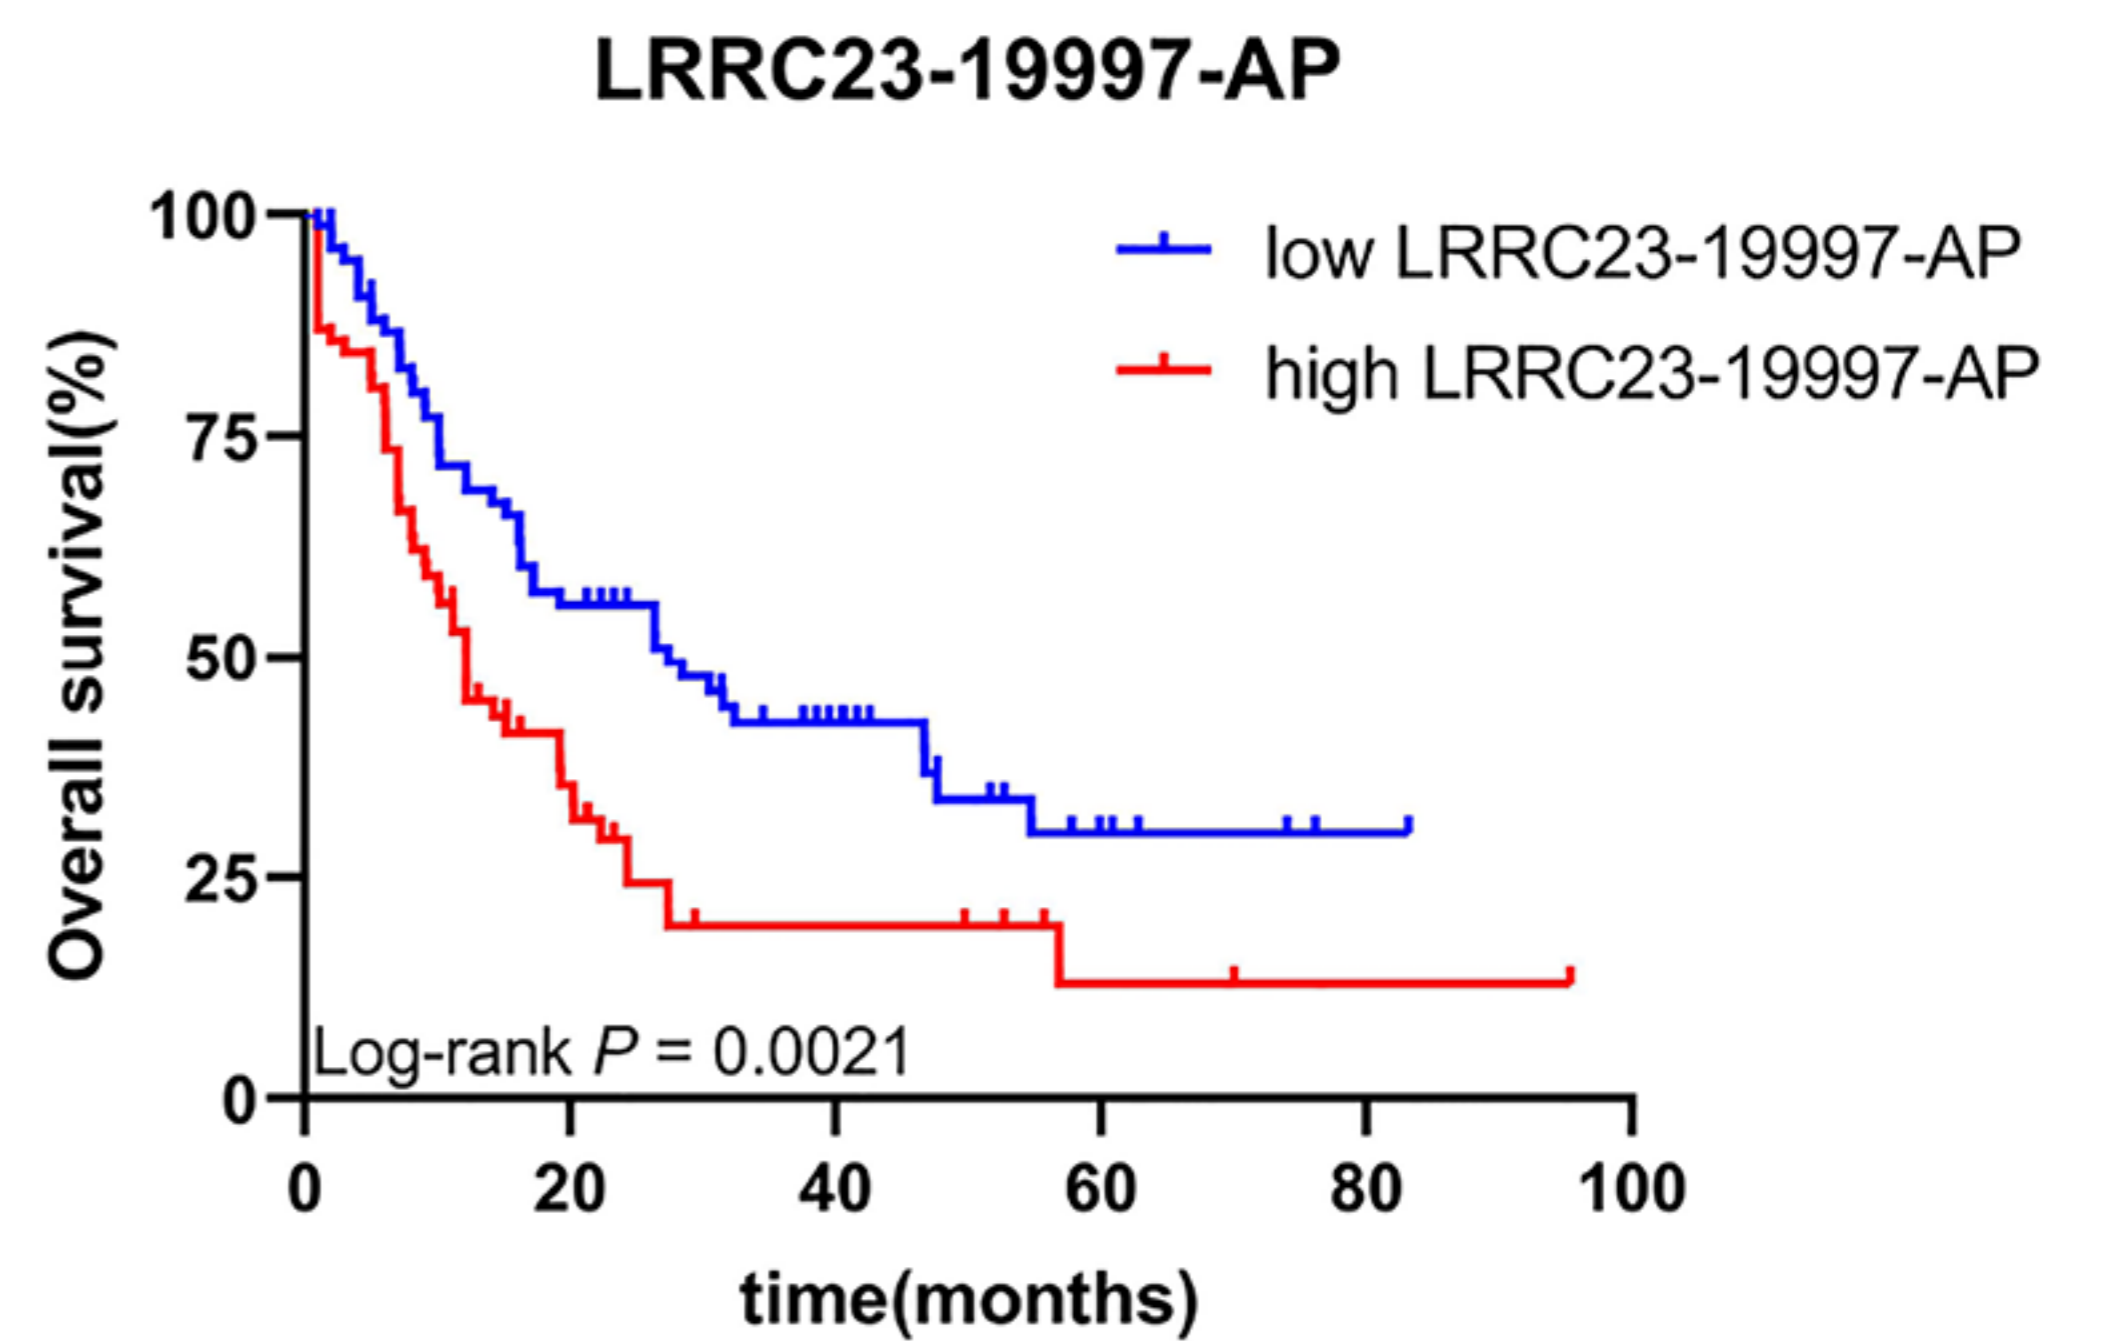

Supplement: 13578_2020_481_MOESM3_ESM.pdf [file 13578_2020_481_MOESM3_ESM.pdf]
